# Supplementary material for: Three novel cation-templated metal thiocyanates with 1-2D polypseudorotaxane frameworks
Source: Royal Society of Chemistry journal article supplement (doi:10.1039/c1ce05528c), 2011-01-01

Supplementary material for

**Three novel cation-Templated metal thiocyanates with 1-2D  
 polypseudorotaxane frameworks**

**Yong-Zhen Qiao, Jun-Ming Yue, Xiu-Cun Liu, and Yun-Yin Niu**

**Table S1.** Selected bond distances(Å) and angles(°)for compounds **1-3**

|                     |            |                     |             |                     |             |
|---------------------|------------|---------------------|-------------|---------------------|-------------|
| <b>Compound 1</b>   |            |                     |             |                     |             |
| Ag(1)-N(6)#1        | 2.255(4)   | Ag(1)-S(1)          | 2.5402(11)  | Ag(1)-S(2)          | 2.5547(11)  |
| Ag(1)-Br(1)         | 2.7684(5)  | Ag(2)-S(3)          | 2.5462(11)  | Ag(2)-Br(2)#2       | 2.6907(6)   |
| Ag(2)-Br(2)         | 2.7498(6)  | Ag(2)-Br(1)         | 2.7529(6)   | Br(2)-Ag(2)#2       | 2.6907(6)   |
| N(6)#1-Ag(1)-S(1)   | 123.30(10) | N(6)#1-Ag(1)-S(2)   | 111.04(9)   | S(1)-Ag(1)-S(2)     | 103.95(4)   |
| N(6)#1-Ag(1)-Br(1)  | 100.53(9)  | S(1)-Ag(1)-Br(1)    | 104.87(3)   | S(2)-Ag(1)-Br(1)    | 113.22(3)   |
| S(3)-Ag(2)-Br(2)#2  | 114.54(3)  | S(3)-Ag(2)-Br(2)    | 117.86(3)   | Br(2)#2-Ag(2)-Br(2) | 102.848(17) |
| S(3)-Ag(2)-Br(1)    | 102.28(3)  | Br(2)#2-Ag(2)-Br(1) | 117.535(19) | Br(2)-Ag(2)-Br(1)   | 101.745(18) |
| Ag(2)-Br(1)-Ag(1)   | 160.76(2)  | Ag(2)#2-Br(2)-Ag(2) | 77.152(17)  | C(19)-S(1)-Ag(1)    | 98.86(14)   |
| C(20)-S(2)-Ag(1)    | 97.50(15)  | C(21)-S(3)-Ag(2)    | 98.15(13)   |                     |             |
| <b>Compound 2</b>   |            |                     |             |                     |             |
| Cu(1)-N(2)#1        | 1.906(3)   | Cu(1)-N(3)#2        | 1.934(3)    | Cu(1)-S(2)          | 2.4116(11)  |
| Cu(1)-S(1)          | 2.5862(9)  |                     |             |                     |             |
| N(2)#1-Cu(1)-N(3)#2 | 133.63(11) | N(2)#1-Cu(1)-S(2)   | 111.99(8)   | N(3)#2-Cu(1)-S(2)   | 99.76(9)    |
| N(2)#1-Cu(1)-S(1)   | 100.11(8)  | N(3)#2-Cu(1)-S(1)   | 103.19(8)   | S(2)-Cu(1)-S(1)     | 105.19(3)   |
| C(8)-S(1)-Cu(1)     | 97.92(10)  | C(9)-S(2)-Cu(1)     | 98.75(12)   |                     |             |
| <b>Compound 3</b>   |            |                     |             |                     |             |
| Cu(1)-N(2)          | 1.926(3)   | Cu(1)-N(3)          | 1.932(3)    | Cu(1)-S(2)          | 2.3757(11)  |
| Cu(1)-S(1)          | 2.6486(10) |                     |             |                     |             |
| N(2)-Cu(1)-N(3)     | 132.80(13) | N(2)-Cu(1)-S(2)     | 112.74(9)   | N(3)-Cu(1)-S(2)     | 101.97(10)  |
| N(2)-Cu(1)-S(1)     | 101.07(8)  | N(3)-Cu(1)-S(1)     | 99.94(9)    | S(2)-Cu(1)-S(1)     | 104.61(4)   |
| C(11)-S(1)-Cu(1)    | 95.28(10)  | C(12)-S(2)-Cu(1)    | 100.90(12)  |                     |             |

**Fig. S1**

(a) The TG-DSC curves of compound **1**

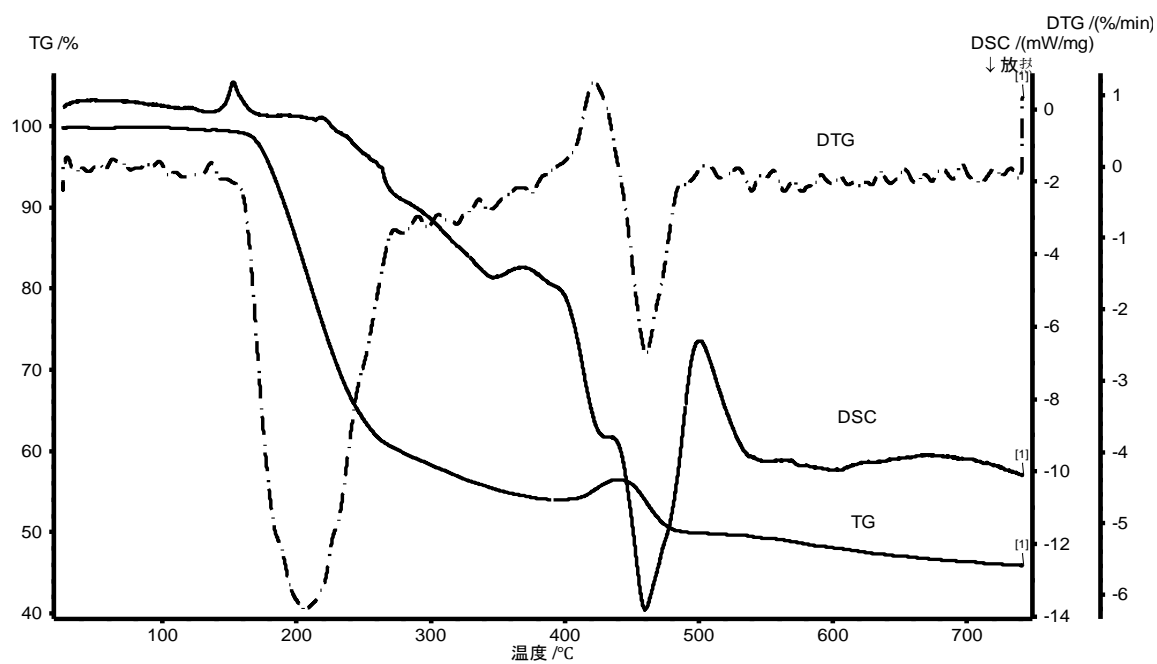

(a) The TG-DSC curves of compound **2**

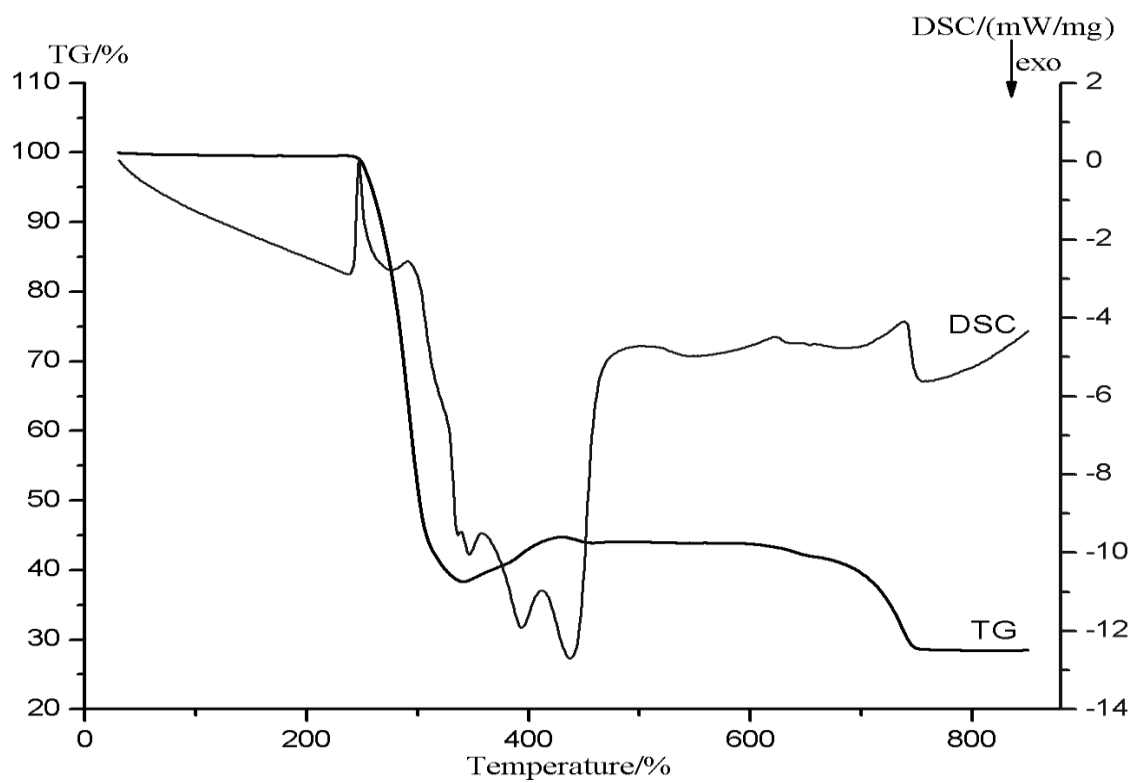

(b) The TG-DSC curves of compound 3

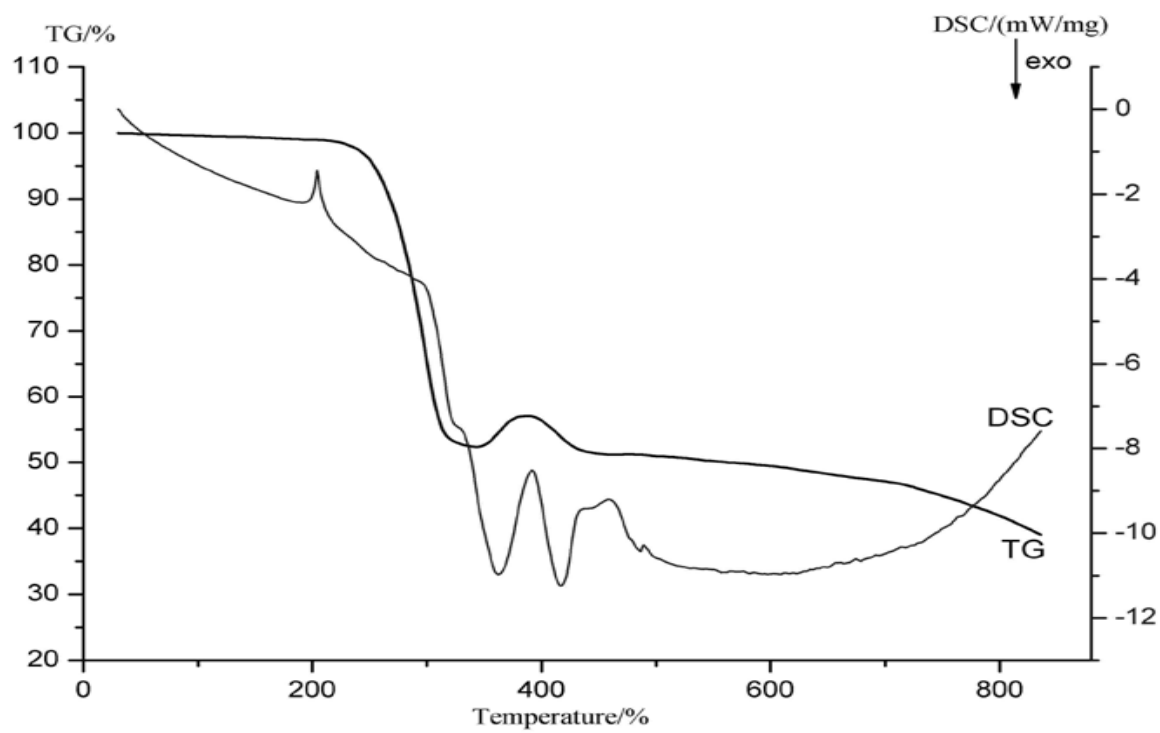

Fig. S2

(a) UV-vis curve for the DMF solution of  $10^{-5}$  M for **1**.

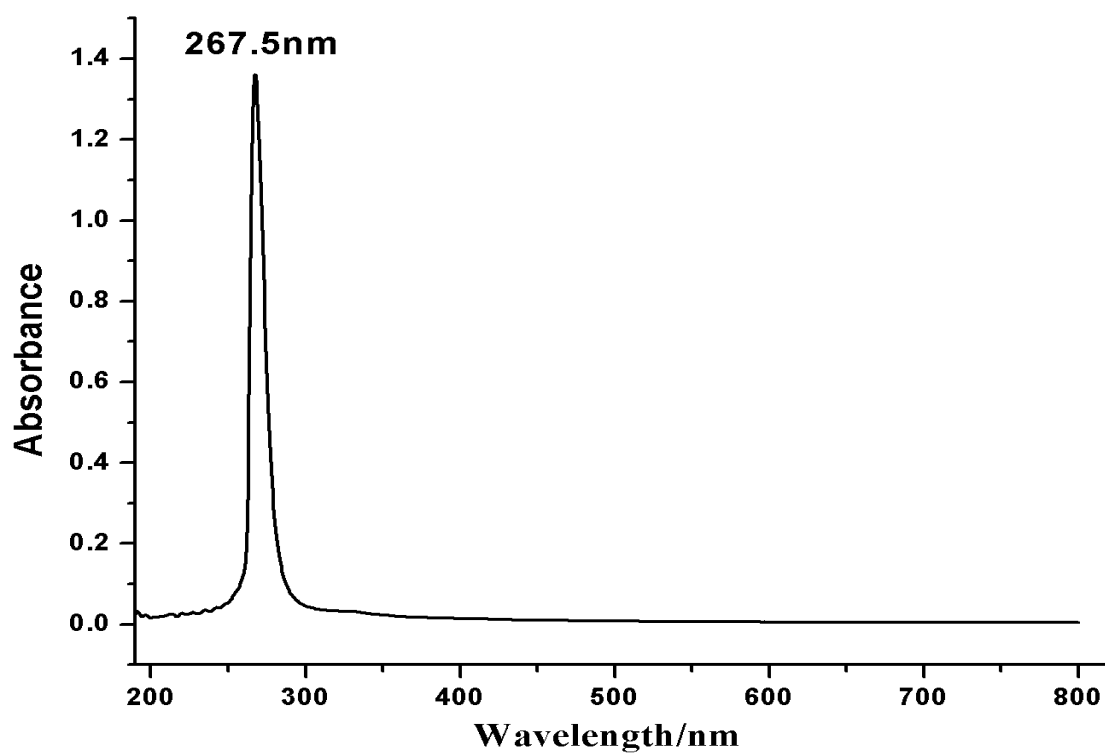

(b) UV-vis curve for the DMF solution of  $10^{-5}$  M for **2**.

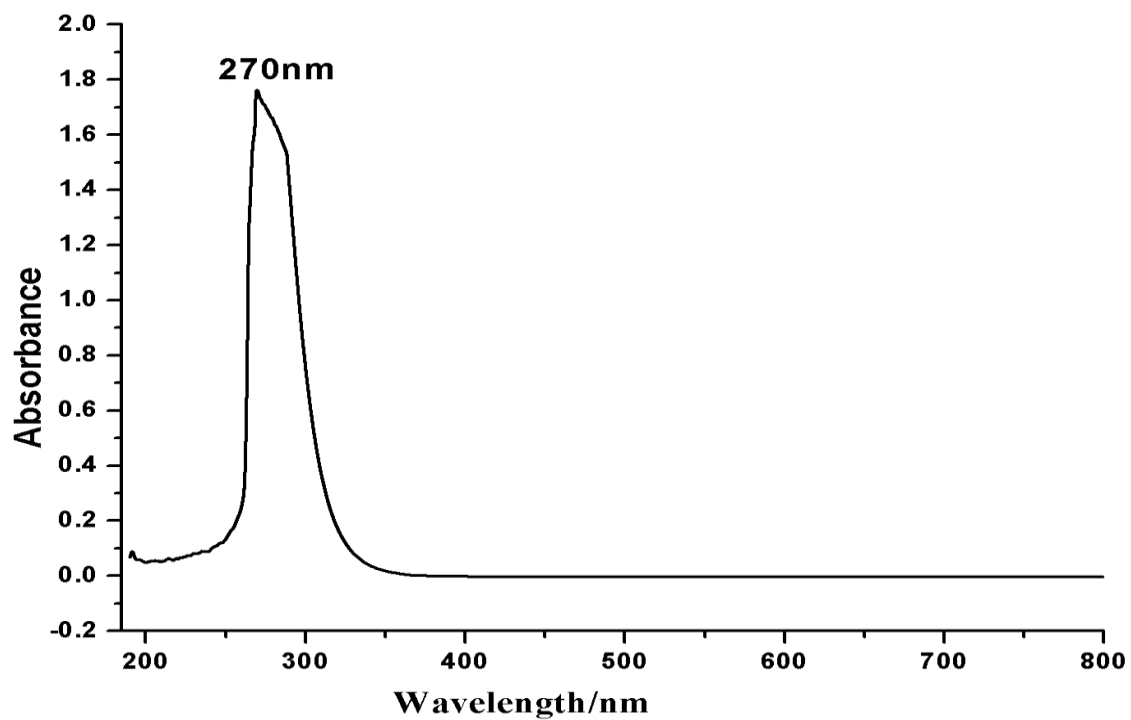

(c) UV-vis curve for the DMF solution of  $10^{-5}$  M for **3**.

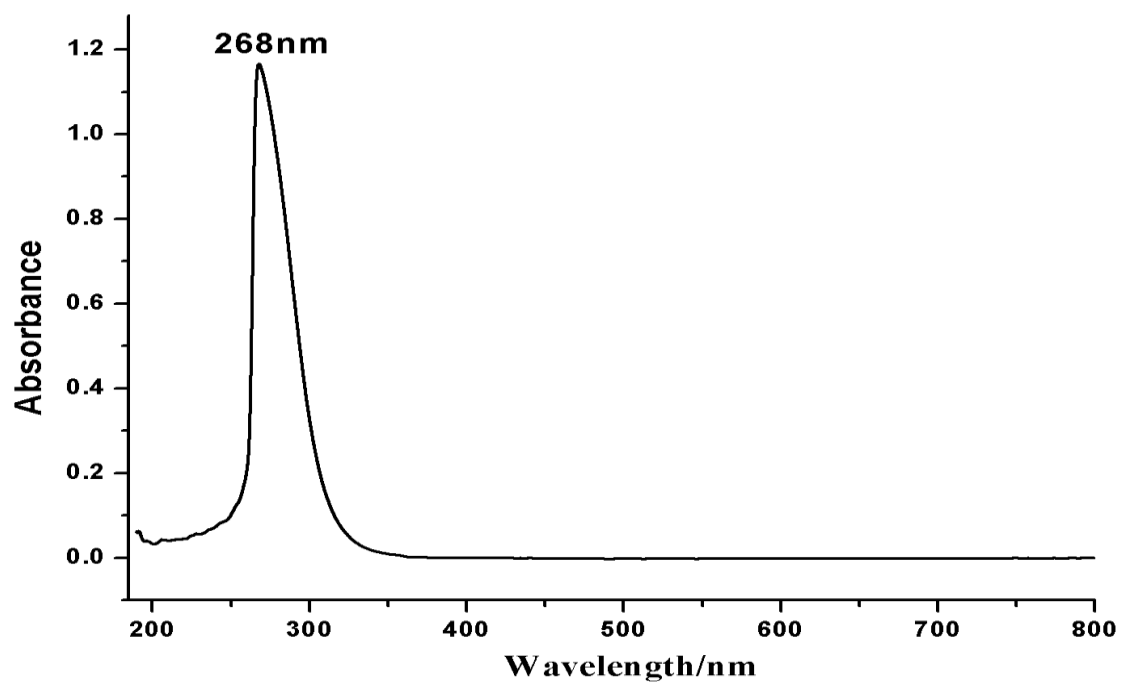

**Fig. S3** Simulated and experimental PXRD pattern of compound **1**.

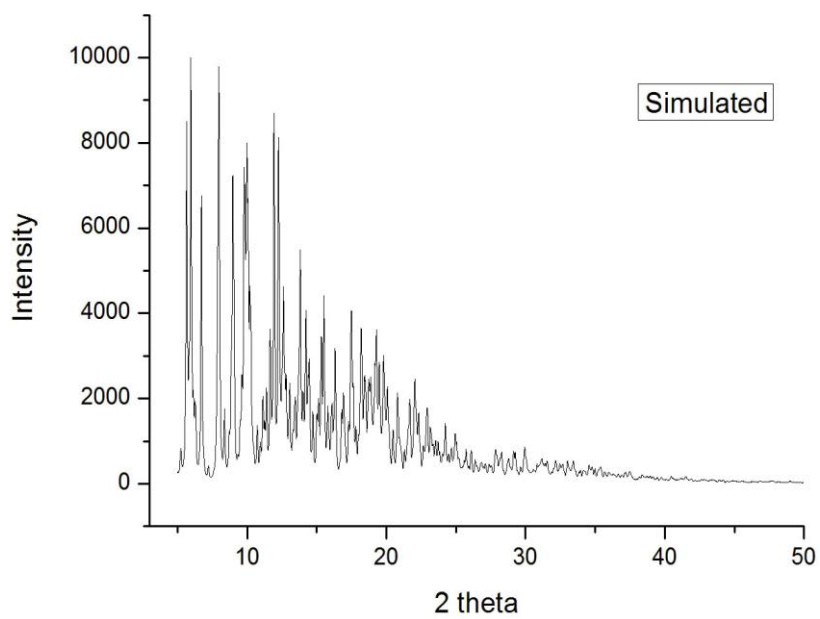

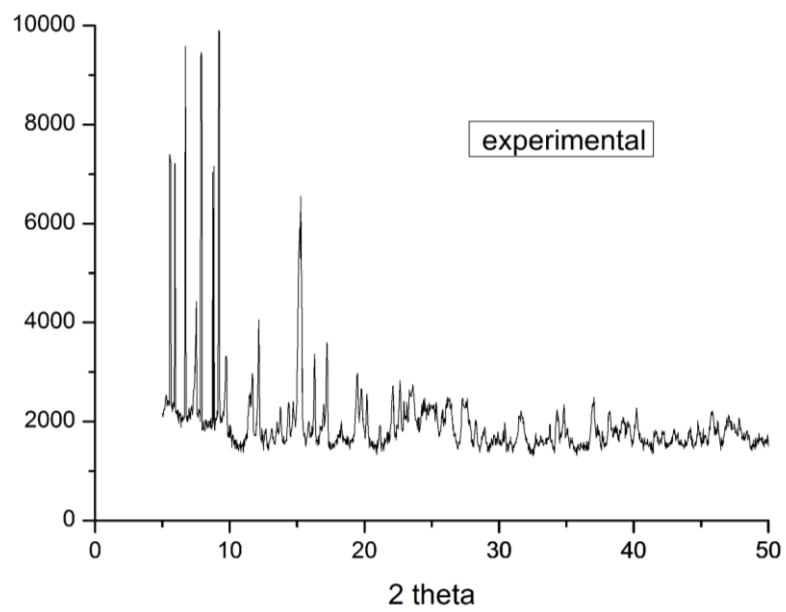

**Fig. S4** Simulated and experimental PXRD pattern of compound **2**.

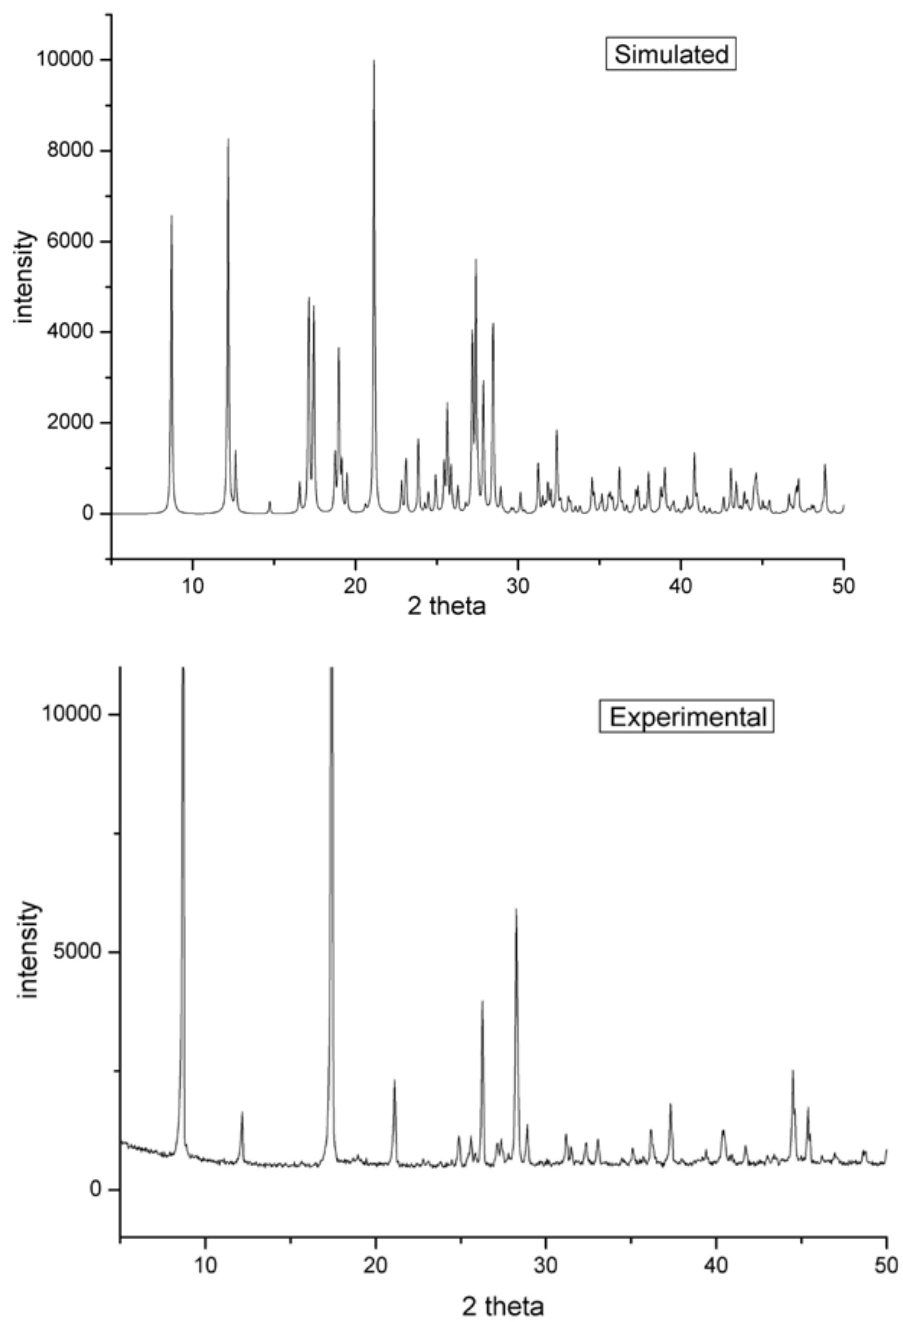

**Fig. S5** Simulated and experimental PXRD pattern of compound **3**.

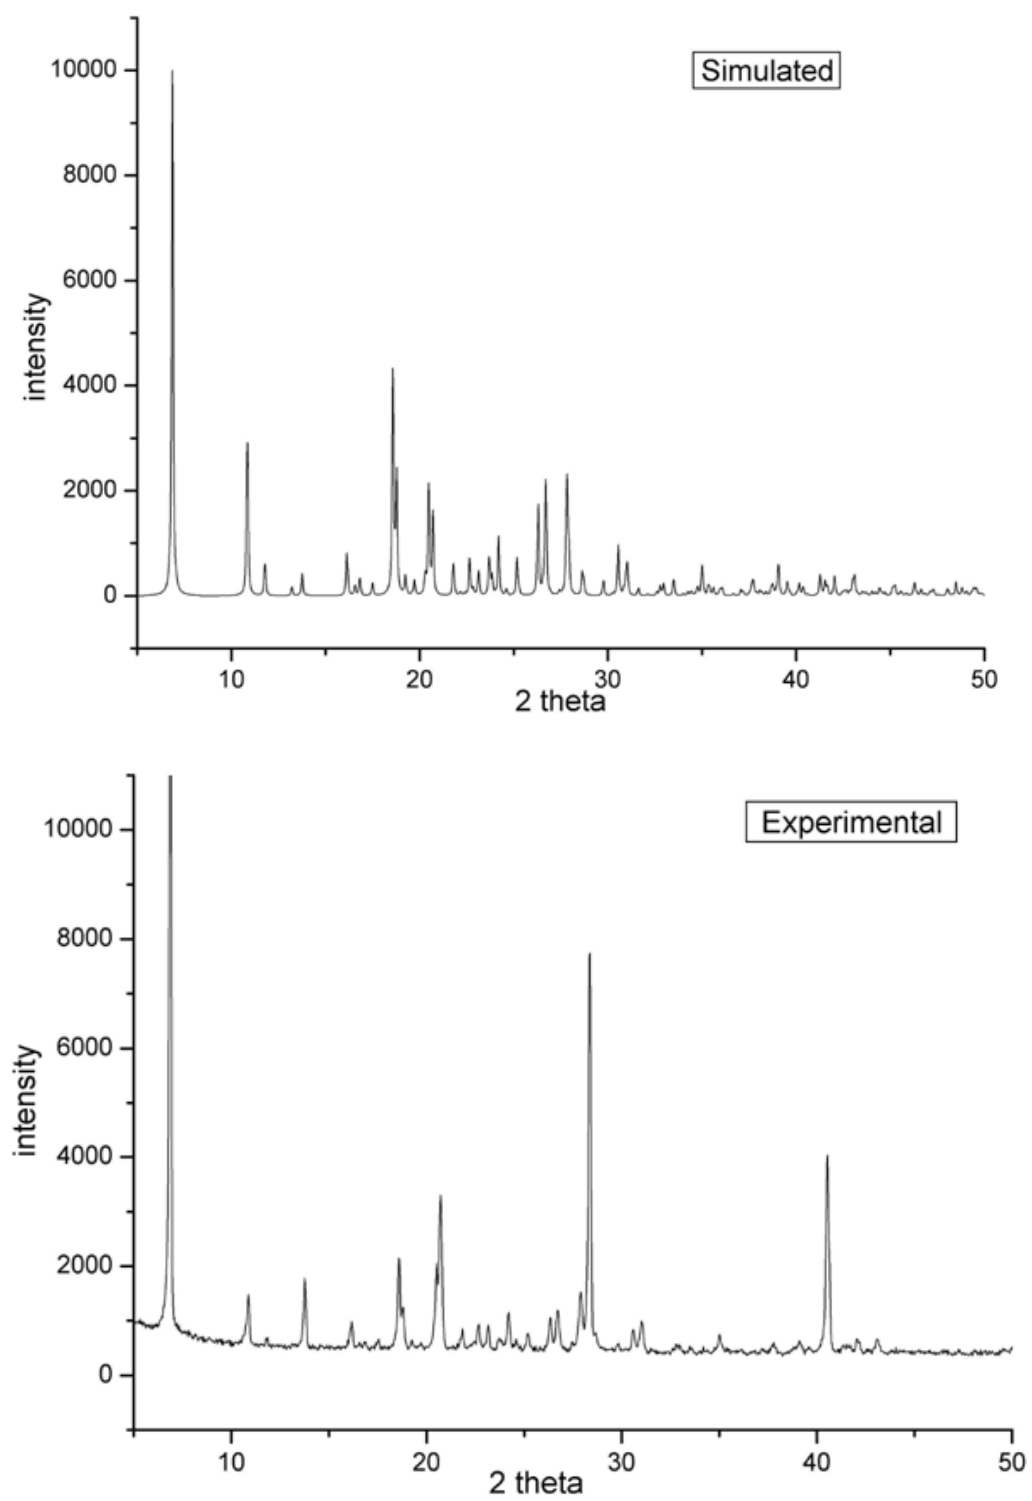

Supplement: c1ce05528c.pdf [file c1ce05528c.pdf]
